# Supplementary material for: Cannabidiol Modulates Emotional Function and Brain-Derived Neurotrophic Factor Expression in Middle-Aged Female Rats Exposed to Social Isolation
Source: MDPI journal article supplement (doi:10.3390/ijms242015492), 2023-10-23
Supplement: s1 [file s1]

## Supplementary Materials

**Table S1. The effects of CBD on weekly weight gain.** For weights taken in the last 4 weeks of the experiment (during CBD injections), repeated measures ANOVA [Drug×SI×Days; 2×2×4] revealed a significant effect of Days ( $F_{(3,108)} = 7.894$ ,  $P < .001$ ) suggesting that all groups significantly gained weight throughout this period. No effects were found for SI ( $F_{(1,36)} = 0.822$ , NS), drug ( $F_{(1,36)} = 0.401$ , NS), or SI × drug interaction ( $F_{(1,36)} = 0.834$ , NS).

| Groups              | Week 1 | Week 2 | Week 3 | Week 4 |
|---------------------|--------|--------|--------|--------|
| <b>SI VEH, N=10</b> |        |        |        |        |
| 1                   | 335    | 330    | 328    | 319    |
| 2                   | 325    | 322    | 326    | 330    |
| 3                   | 366    | 360    | 351    | 365    |
| 4                   | 360    | 355    | 345    | 341    |
| 5                   | 342    | 383    | 378    | 372    |
| 6                   | 316    | 310    | 320    | 327    |
| 7                   | 330    | 350    | 343    | 332    |
| 8                   | 312    | 306    | 314    | 318    |
| 9                   | 314    | 320    | 385    | 387    |
| 10                  | 320    | 333    | 324    | 330    |
| <b>GH VEH, N=10</b> |        |        |        |        |
| 1                   | 400    | 380    | 380    | 385    |
| 2                   | 300    | 305    | 300    | 301    |
| 3                   | 300    | 295    | 291    | 292    |
| 4                   | 310    | 305    | 303    | 310    |
| 5                   | 300    | 290    | 291    | 285    |
| 6                   | 333    | 335    | 335    | 338    |
| 7                   | 339    | 341    | 342    | 340    |
| 8                   | 321    | 325    | 330    | 331    |
| 9                   | 322    | 330    | 331    | 335    |
| 10                  | 360    | 355    | 344    | 370    |
| <b>SI CBD, N=9</b>  |        |        |        |        |
| 1                   | 339    | 343    | 342    | 347    |
| 2                   | 347    | 342    | 351    | 355    |
| 3                   | 315    | 327    | 333    | 338    |
| 4                   | 314    | 323    | 330    | 331    |
| 5                   | 342    | 339    | 343    | 345    |
| 6                   | 334    | 341    | 339    | 349    |
| 7                   | 333    | 332    | 327    | 337    |
| 8                   | 340    | 341    | 343    | 345    |
| 9                   | 315    | 323    | 327    | 338    |

| <b>GH CBD, N=11</b> |     |     |     |     |
|---------------------|-----|-----|-----|-----|
| 1                   | 325 | 323 | 328 | 331 |
| 2                   | 311 | 328 | 325 | 339 |
| 3                   | 332 | 339 | 344 | 344 |
| 4                   | 370 | 365 | 361 | 374 |
| 5                   | 335 | 363 | 346 | 341 |
| 6                   | 339 | 347 | 345 | 345 |
| 7                   | 323 | 327 | 336 | 350 |
| 8                   | 317 | 325 | 339 | 351 |
| 9                   | 330 | 338 | 330 | 339 |
| 10                  | 328 | 335 | 335 | 338 |
| 11                  | 307 | 319 | 327 | 339 |
